# Supplementary material for: Perceptions of Probiotics and Kombucha Consumption in Relation to Emotion Regulation: An Exploratory Study Comparing Portugal and Brazil
Source: MDPI journal article supplement (doi:10.3390/beverages9030061), 2023-07-24
Supplement: s1 [file s1]

## Supplementary document

### Anexo I. Questionário online desenvolvido através da plataforma Qualtrics

#### Consentimento informado

Caro participante, O presente estudo integra-se numa linha de investigação desenvolvida pelo Human Neurobehavioral Laboratory (HNL) da Faculdade de Educação e Psicologia na Universidade Católica Portuguesa (UCP) no Porto. Este estudo tem como objetivo conhecer a perceção da população sobre o consumo de probióticos e de Kombucha e o seu impacto ao nível da regulação emocional.

**Participação:** Para completar o estudo, serão necessários 7 minutos, em média. Não há resposta certa ou errada, e de forma a obtermos informação válida, é importante que responda da forma mais sincera a todas as questões.

**Compromisso Ético:** A sua participação é voluntária e as respostas ao questionário são confidenciais. Os dados servirão apenas para fins de investigação por parte do nosso grupo. É também livre de desistir da sua participação a qualquer momento, caso seja esse o seu desejo, sem que existam quaisquer consequências para si.

**Contactos:** Para qualquer esclarecimento adicional ou para conhecer os resultados da investigação, poderá contactar a responsável do estudo, Investigadora Patrícia Batista, através do seguinte contacto: [pbatista@ucp.pt](mailto:pbatista@ucp.pt) ou o grupo de investigação através do endereço de email [hnl@porto.ucp.pt](mailto:hnl@porto.ucp.pt).

Caro participante, este inquérito é anónimo. Se concordar participar, por favor assinale as opções abaixo.

☐ Eu confirmo ter 18 anos de idade.

☐ Declaro ter lido e compreendido este documento, bem como as informações que me foram fornecidas pelo investigador.

☐ Sei que sou livre de abandonar o estudo, se for esse o meu desejo, sem quaisquer consequências para mim, e que a minha identidade jamais será revelada e os dados permanecerão confidenciais.

Dessa forma, aceita participar nesta investigação e permitir a recolha e a utilização dos dados, confiando nas garantias de confidencialidade e anonimato que foram referidas?

☐ Sim, aceito participar neste projeto de investigação.

☐ Não aceito participar neste projeto de investigação.

#### **(I) Informação Sociodemográfica**

Q1. Por favor, indique a sua idade (anos): \_\_\_\_\_

Q2. Por favor, indique o seu sexo: ☐ Feminino ☐ Masculino ☐ Prefiro não responder

Q3. Por favor, indique a sua Nacionalidade: ☐ Portuguesa ☐ Outra: \_\_\_\_\_

Q4. Por favor, indique o seu estado civil:

☐ Solteiro(a)

☐ União de facto

- ☐ Casado(a)
- ☐ Separado(a)/ Divorciado(a)
- ☐ Viúvo(a)

Q5. Por favor, indique as suas habilitações académicas (já concluídas):

- ☐ Educação básica/ primária
- ☐ Educação secundária
- ☐ Licenciatura
- ☐ Mestrado
- ☐ Doutoramento
- ☐ Outra: \_\_\_\_\_

Q6. Por favor, indique a sua atividade profissional principal:

- ☐ Estudante
- ☐ Outra atividade: \_\_\_\_\_

Q7. Com que frequência pratica exercício físico?

- ☐ Diariamente
- ☐ Várias vezes por semana
- ☐ Semanalmente
- ☐ Mensalmente
- ☐ Raramente
- ☐ Nunca

Q8. Atualmente, é fumador?

- ☐ Sim
- ☐ Não

Q9. Alguma vez teve acompanhamento psiquiátrico e/ou psicológico?

- ☐ Sim
- ☐ Não

Q10. Atualmente, tem acompanhamento psiquiátrico e/ou psicológico?

- ☐ Sim
- ☐ Não

Q11. Considerando o último mês, acredita que tem boas noites de sono (e.g., dorme a quantidade de horas necessária, acorda revigorado, não apresenta um sono fragmentado, etc.)?

- ☐ Sim
- ☐ Na maioria das noites
- ☐ Raramente
- ☐ Não

Q12. Indique quantas horas dorme em média por noite?

- ☐ Menos de 5 horas
- ☐ Entre 5 e 7 horas
- ☐ Mais de 7 horas

Q13. Em geral, diria que a sua saúde hoje é?

- ☐ Ótima
- ☐ Muito boa
- ☐ Boa

- ☐ Razoável
- ☐ Fraca

## **(II) Informação sobre Probióticos e Kombucha**

Q14. Sabe o que são produtos probióticos?

- ☐ Sim
- ☐ Não

Q15. Como ficou a conhecer os produtos probióticos?

- ☐ Redes sociais (facebook, instagram, tiktok, etc.)
- ☐ Profissionais de saúde (médicos, farmacêuticos, enfermeiros, etc.)
- ☐ Farmácias ou parafarmácias
- ☐ Publicidades (televisão, revistas, etc.)
- ☐ Supermercados, mercearias ou outras superfícies comerciais
- ☐ Artigos Científicos
- ☐ Outro(s): \_\_\_\_\_

Q16. Indique, qual(is) é(são), para si, o(s) benefício(s) associado(s) ao consumo de probióticos:

- ☐ Melhoria do Sistema imunitário
- ☐ Equilíbrio do trato gastrointestinal
- ☐ Prevenção de doenças cardiovasculares e cancro
- ☐ Antidiabético
- ☐ Estrutura óssea mais forte
- ☐ Estimulação de crescimento bacteriano no intestino
- ☐ Melhoria da saúde mental
- ☐ Melhoria das funções cognitivas
- ☐ Regulação emocional
- ☐ Outro(s): \_\_\_\_\_

Q17. Com que frequência, consome produtos probióticos?

- ☐ Diariamente
- ☐ Semanalmente
- ☐ Mensalmente
- ☐ Raramente
- ☐ Nunca

Q18. Se consome probióticos, que tipo(s) de produto(s) probiótico(s) consome?

- ☐ Medicação
- ☐ Iogurtes
- ☐ Vegetais Fermentados
- ☐ Suplementos vendidos em farmácia
- ☐ Suplementos vendidos em supermercados e parafarmácias
- ☐ Outro(s): \_\_\_\_\_

Q19. Conhece o produto probiótico “KOMBUCHA”?

- ☐ Sim
- ☐ Não

Q20. Já alguma vez experimentou Kombucha?

- ☐ Sim
- ☐ Não

Q21. Com que frequência costuma consumir Kombucha?

- ☐ Diariamente
- ☐ Semanalmente
- ☐ Mensalmente
- ☐ Raramente
- ☐ Nunca

Q22. Indique qual(is) é(são) o(s) benefício(s) da Kombucha:

- ☐ Antibacteriano
- ☐ Anti-inflamatório
- ☐ Antidiabético
- ☐ Anti proliferativo
- ☐ Melhoria da atividade gastrointestinal
- ☐ Regulação emocional
- ☐ Melhoria das funções cognitivas

Q23. Qual é o seu grau de satisfação em relação aos benefícios que a Kombucha apresenta para a saúde?

- ☐ Muito satisfeito
- ☐ Satisfeito
- ☐ Indiferente
- ☐ Pouco satisfeito
- ☐ Totalmente insatisfeito

Q24. Indique quais destas frases se aplicam a si, selecionando a opção "SIM" ou "NÃO", relativamente a Produtos Probióticos.

|                                                                        | SIM | NÃO |
|------------------------------------------------------------------------|-----|-----|
| 1. Tenho receio de consumir alimentos que nunca experimentei antes.    |     |     |
| 2. Gosto de experimentar produtos novos.                               |     |     |
| 3. Produtos probióticos têm um sabor diferente.                        |     |     |
| 4. Acredito que os probióticos ofereçam benefícios para a nossa saúde. |     |     |
| 5. A informação destacada nos rótulos é relevante para mim.            |     |     |
| 6. Os produtos probióticos são caros.                                  |     |     |
| 7. Compraria mais probióticos se fossem mais baratos.                  |     |     |
| 8. Consumiria probióticos com maior frequência se                      |     |     |

|                                                                                             |  |  |
|---------------------------------------------------------------------------------------------|--|--|
| fossem aconselhados pelo médico.                                                            |  |  |
| 9. Consumo probióticos lácteos frequentemente porque trazem benefícios para a saúde.        |  |  |
| 10. Os produtos probióticos lácteos tem a função de melhorar a saúde gástrica e intestinal. |  |  |

Q25. Indique quais destas frases se aplicam a si, selecionando a opção "SIM" ou "NÃO", relativamente à bebida Kombucha.

|                                                                                                    | SIM | NÃO |
|----------------------------------------------------------------------------------------------------|-----|-----|
| 1. O sabor da Kombucha agrada-me.                                                                  |     |     |
| 2. Gostaria de consumir Kombucha com mais frequência.                                              |     |     |
| 3. Após o consumo de Kombucha sinto-me melhor fisicamente, nomeadamente a nível gastrointestinal.  |     |     |
| 4. Sinto-me indiferente após o consumo da Kombucha.                                                |     |     |
| 5. Sinto-me energético após o consumo de Kombucha.                                                 |     |     |
| 6. Consumiria mais Kombucha se tivesse mais informação disponibilizada quanto aos seus benefícios. |     |     |
| 7. Gostaria de manter o consumo de Kombucha.                                                       |     |     |

**Questionário de Regulação Emocional J. Gross & O. John (2003)**

Adaptado para a População Portuguesa por Filipa Machado Vaz & Carla Martins (2008)

Instruções:

Gostaríamos de lhe colocar algumas questões acerca da sua vida emocional, em particular como controla (isto é, como regula e gere) as suas emoções. As seguintes abaixo envolvem duas componentes distintas da sua vida emocional. Uma é a sua experiência emocional, isto é, a forma como se sente. A outra componente é a expressão emocional, ou seja, a forma como demonstra as suas emoções na forma como fala, faz determinados gestos ou atua. Apesar de algumas afirmações poderem parecer semelhantes, diferem em importantes aspetos. Para cada item, por favor responda utilizando a seguinte escala:

|            |         |         |              |         |         |            |
|------------|---------|---------|--------------|---------|---------|------------|
| 1 -----    | 2 ----- | 3 ----- | 4 -----      | 5 ----- | 6 ----- | 7          |
| Discordo   |         |         | Não concordo |         |         | Concordo   |
| Totalmente |         |         | nem concordo |         |         | Totalmente |

1. Quando quero sentir mais emoções positivas (como alegria ou contentamento), mudo o que estou a pensar.
2. Guardo as minhas emoções para mim próprio.
3. Quando quero sentir menos emoções negativas (como tristeza ou raiva) mudo o que estou a pensar.
4. Quando estou a sentir emoções positivas, tenho cuidado para não as expressar.
5. Quando estou perante uma situação stressante, forço-me a pensar sobre essa mesma situação, de uma forma que me ajude a ficar calmo.
6. Eu controlo as minhas emoções não as expressando.
7. Quando quero sentir mais emoções positivas, eu mudo a forma como estou a pensar acerca da situação.
8. Eu controlo as minhas emoções modificando a forma de pensar acerca da situação em que me encontro.
9. Quando estou a experienciar emoções negativas, faço tudo para não as expressar.
10. Quando quero sentir menos emoções negativas, mudo a forma como estou a pensar acerca da situação.
